# Supplementary material for: Post-translational Control of RNA-Binding Proteins and Disease-Related Dysregulation
Source: PubMed Central journal article supplement (PMC8111222; doi:10.3389/fmolb.2021.658852), 2021-04-27
Supplement: Table_1.pdf [file Table_1.pdf]

| PTM                                         | Unmodified Residue                                                                                                                 | Modified Residue                                                                                                                                    |
|---------------------------------------------|------------------------------------------------------------------------------------------------------------------------------------|-----------------------------------------------------------------------------------------------------------------------------------------------------|
| Acetylation                                 | 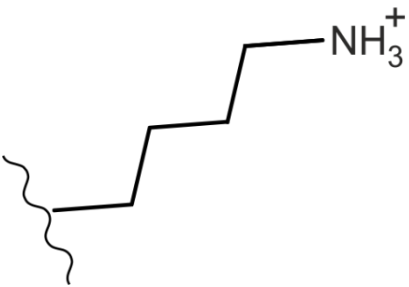 <p data-bbox="603 674 691 707">Lysine</p>        |  <p data-bbox="1082 674 1241 707">Acetyllysine</p>                |
| Citrullination                              |  <p data-bbox="592 1133 703 1167">Arginine</p>   |  <p data-bbox="1102 1133 1222 1167">Citrulline</p>               |
| Glycosylation<br>(O-glycosyl-N-acetylation) |  <p data-bbox="603 1552 691 1585">Serine</p>    |  <p data-bbox="1010 1552 1313 1585">O-GlcNAcylated serine</p>   |
|                                             |  <p data-bbox="579 1966 715 2000">Threonine</p> |  <p data-bbox="991 1966 1334 2000">O-GlcNAcylated threonine</p> |

| PTM           | Unmodified Residue                                                                                                                                                                                       | Modified Residue                                                                                                                          |
|---------------|----------------------------------------------------------------------------------------------------------------------------------------------------------------------------------------------------------|-------------------------------------------------------------------------------------------------------------------------------------------|
| Hydroxylation | 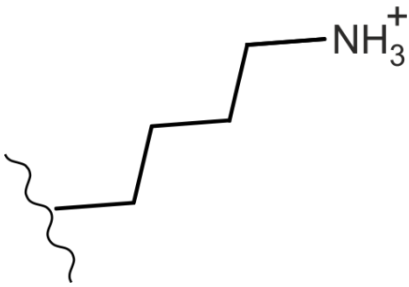 <p data-bbox="603 667 691 701">Lysine</p>                                                                              |  <p data-bbox="1066 667 1257 701">Hydroxylysine</p>     |
|               |  <p data-bbox="603 1317 691 1350">Proline</p>                                                                          |  <p data-bbox="1066 1317 1265 1350">Hydroxyproline</p> |
| Isomerization |  <p data-bbox="587 1899 722 1933"><i>cis</i> Proline</p> <p data-bbox="1114 1899 1289 1933"><i>trans</i> Proline</p> |                                                                                                                                           |

| PTM         | Unmodified Residue                                                                                                               | Modified Residue                                                                                                                                         |
|-------------|----------------------------------------------------------------------------------------------------------------------------------|----------------------------------------------------------------------------------------------------------------------------------------------------------|
| Methylation |                                                                                                                                  | 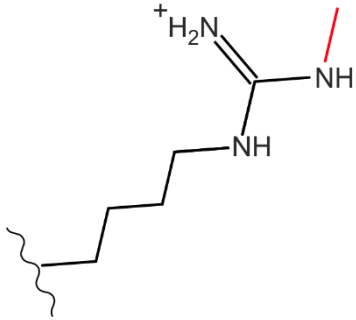 <p data-bbox="1002 600 1321 640">N<sup>ε</sup>-monomethylarginine</p> |
|             |  <p data-bbox="590 1034 702 1075">Arginine</p> |  <p data-bbox="970 1034 1353 1075">Asymmetric dimethylarginine</p>    |
|             |                                                                                                                                  |  <p data-bbox="976 1505 1343 1545">Symmetric dimethylarginine</p>    |
|             |  <p data-bbox="603 1944 692 1984">Lysine</p>  |  <p data-bbox="1040 1935 1279 1975">Monomethyllysine</p>             |

| PTM                                  | Unmodified Residue                                                                                                                          | Modified Residue                                                                                                                                  |
|--------------------------------------|---------------------------------------------------------------------------------------------------------------------------------------------|---------------------------------------------------------------------------------------------------------------------------------------------------|
| Methylation                          | 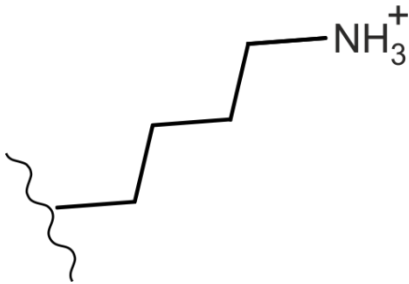 <p data-bbox="603 824 691 860">Lysine</p>                 |  <p data-bbox="1066 607 1257 642">Dimethyllysine</p>            |
|                                      |                                                                                                                                             |  <p data-bbox="1066 1048 1265 1084">Trimethyllysine</p>         |
| Myristoylation                       |  <p data-bbox="528 1496 762 1532">N-terminal glycine</p> |  <p data-bbox="1023 1496 1299 1532">Myristoylated glycine</p> |
| PARylation<br>(polyADP-ribosylation) |  <p data-bbox="580 1957 708 1993">Aspartate</p>          |  <p data-bbox="1023 1957 1299 1993">PARylated aspartate</p>   |

| PTM                                  | Unmodified Residue                                                                                   | Modified Residue                                                                                              |
|--------------------------------------|------------------------------------------------------------------------------------------------------|---------------------------------------------------------------------------------------------------------------|
| PARylation<br>(polyADP-ribosylation) | 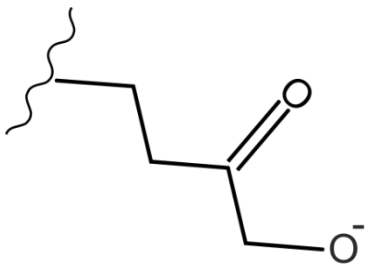 <p>Glutamate</p>   |  <p>PARylated glutamate</p> |
|                                      |  <p>Lysine</p>      |  <p>PARylated lysine</p>    |
| Phosphorylation                      |  <p>Serine</p>    |  <p>Phosphoserine</p>     |
|                                      |  <p>Threonine</p> |  <p>Phosphothreonine</p>  |

| PTM                                    | Unmodified Residue                                                                                             | Modified Residue                                                                                                        |
|----------------------------------------|----------------------------------------------------------------------------------------------------------------|-------------------------------------------------------------------------------------------------------------------------|
| Phosphorylation                        | 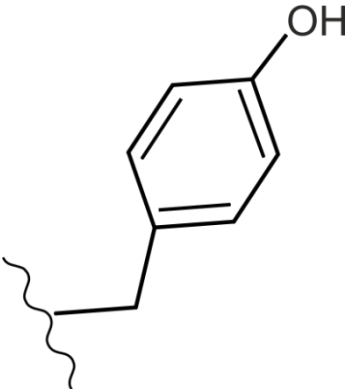 <p>Tyrosine</p>              |  <p>Phosphotyrosine</p>               |
| Proteolysis (caspase cleavage)         |  <p>Aspartate-amino acid</p> |  <p>Cleavage after aspartate</p>     |
| S-sulfhydration                        |  <p>Cysteine</p>            |  <p>S-sulfhydrated cysteine</p>     |
| Ubiquitin (Ub) and Ub-like conjugation |  <p>Lysine</p>              |  <p>Ub-/SUMO-/NEDDylated lysine</p> |

**Table S1.** List of PTMs described for RBPs. Chemical modifications are highlighted in red.

|               |                                                          |
|---------------|----------------------------------------------------------|
| AUF-1         | AU-rich binding factor 1                                 |
| FUS           | Fused in sarcoma                                         |
| FXR2P         | Fragile X-related protein 2                              |
| G3BP1         | Ras-GAP SH3 domain-binding protein 1                     |
| hnRNP A1/A2/K | Heterogeneous nuclear ribonucleoprotein A1, A2 and K     |
| Hsp27         | Heat shock protein 27                                    |
| HuR           | Human antigen R                                          |
| KSRP          | KH-type splicing regulatory protein                      |
| NCL           | Nucleolin                                                |
| SRSF1/3       | Serine/arginine-rich splicing factor 1 and 3             |
| TDP-43        | TAR DNA-binding protein of 43 KDa                        |
| TIA-1/TIAR    | T-cell intracellular antigen 1 and TIA-1-related protein |
| TTP           | Tristetraprolin                                          |

**Table S2.** List of RBPs referenced in this Mini Review by alphabetical order.
